# Supplementary material for: Semi-insulating behaviour of self-assembled tin(iv)corrole nanospheres
Source: Royal Society of Chemistry journal article supplement (doi:10.1039/c4dt01257g), 2014-01-01
Supplement: c4dt01257g1.pdf [file c4dt01257g1.pdf]

# Electronic supplementary information (ESI†)

## Semi-insulating behaviour of self-assembled tin(IV)corrole nanospheres

Woormileela Sinha,<sup>a</sup> Mohit Kumar,<sup>b</sup> Antara Garai,<sup>a</sup> Chandra Shekhar Purohit,<sup>a</sup>  
Tapobrata Som <sup>\*b</sup> and Sanjib Kar<sup>\*a</sup>

<sup>a</sup>School of Chemical Sciences, National Institute of Science Education and Research (NISER), Bhubaneswar – 751005, India.  
E-mail: [sanjib@niser.ac.in](mailto:sanjib@niser.ac.in)

<sup>b</sup>Institute of Physics, Sachivalaya Marg, Bhubaneswar – 751005, India. E-mail: [tsom@iopb.res.in](mailto:tsom@iopb.res.in)

- Fig. S1** Electronic absorption spectrum of 10-(2,4,5-trimethoxyphenyl)-5,15-bis(4-cyanophenyl)corrolato-tin(IV)-chloride, **1B**, (green line) 5,10,15-tris(4-cyanophenyl) corrolato-tin(IV)-chloride, **2B**, (blue line) and 10-(4-bromophenyl)-5,15-bis(4-cyanophenyl)corrolato-tin(IV)-chloride, **3B**, (red line) (Color online) in dichloromethane.
- Fig. S2**  $^{13}\text{C}$  NMR spectrum of 10-(4-bromophenyl)-5,15-bis(4-cyanophenyl) corrolato-tin(IV)-chloride, **3B**, in  $\text{CDCl}_3$ .
- Fig. S3** ESI- MS spectrum of (a) 10-(2,4,5-Trimethoxyphenyl)-5,15-bis(4-cyanophenyl)corrolato-tin(IV)-chloride, **1B** (b) 5,10,15-tris(4-cyanophenyl) corrolato-tin(IV)-chloride, **2B** and (c) 10-(4-bromophenyl)-5,15-bis(4-cyanophenyl)corrolato-tin(IV)-chloride, **3B** in  $\text{CH}_3\text{CN}$  shows the measured spectrum with isotopic distribution pattern.
- Fig. S4**  $^1\text{H}$  NMR spectrum of 10-(2,4,5-Trimethoxyphenyl)-5,15-bis(4-cyanophenyl)corrolato-tin(IV)-chloride, **1B** in  $\text{CDCl}_3$ .
- Fig. S5**  $^1\text{H}$  NMR spectrum of 5,10,15-tris(4-cyanophenyl)corrolato-tin(IV) chloride, **2B** in  $\text{CDCl}_3$ .
- Fig. S6**  $^1\text{H}$  NMR spectrum of 10-(4-bromophenyl)-5,15-bis(4-cyanophenyl)corrolato-tin(IV)-chloride, **3B**, in  $\text{CDCl}_3$ .
- Fig. S7** Single-crystal X-ray structure of 10-(2,4,5-Trimethoxyphenyl)-5,15-bis(4-cyanophenyl)corrolato-tin(IV)-chloride, **1B**, (a) top view (b) side view. Hydrogen atoms are omitted for clarity.
- Fig. S8** Single-crystal X-ray structure of 5,10,15-tris(4-cyanophenyl)corrolato-tin(IV) chloride, **2B**, (a) top view (b) side view, and (c)  $\pi$ -  $\pi$  stacking interactions. Hydrogen atoms are omitted for clarity.
- Fig. S9** Single-crystal X-ray structure of 10-(4-bromophenyl)-5,15-bis(4-cyanophenyl) corrolato-tin(IV)-chloride, **3B**, (a) top view (b) side view. Hydrogen atoms are omitted for clarity.
- Fig. S10** Vertical displacement of the peripheral carbon atoms from the N4 corrole planes in (a) **1B** (b) **2B** and (c) **3B**.

**Fig. S11** EDX elemental analysis obtained from the nanospheres of **3B** showing the presence of the entire constituent elements: C, N, Cl, Br, and Sn.

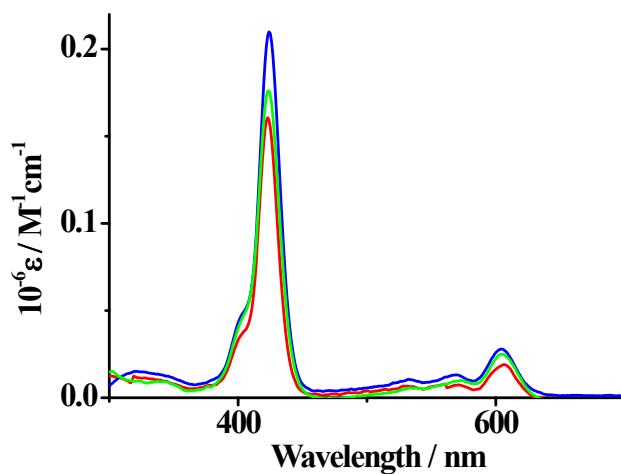

**Fig. S1** Electronic absorption spectrum of 10-(2,4,5-trimethoxyphenyl)-5,15-bis(4-cyanophenyl)corrolato-tin(IV)-chloride, **1B**, (green line) 5,10,15-tris(4-cyanophenyl)corrolato-tin(IV)-chloride, **2B**, (blue line) and 10-(4-bromophenyl)-5,15-bis(4-cyanophenyl)corrolato-tin(IV)-chloride, **3B**, (red line) (Color online) in dichloromethane.

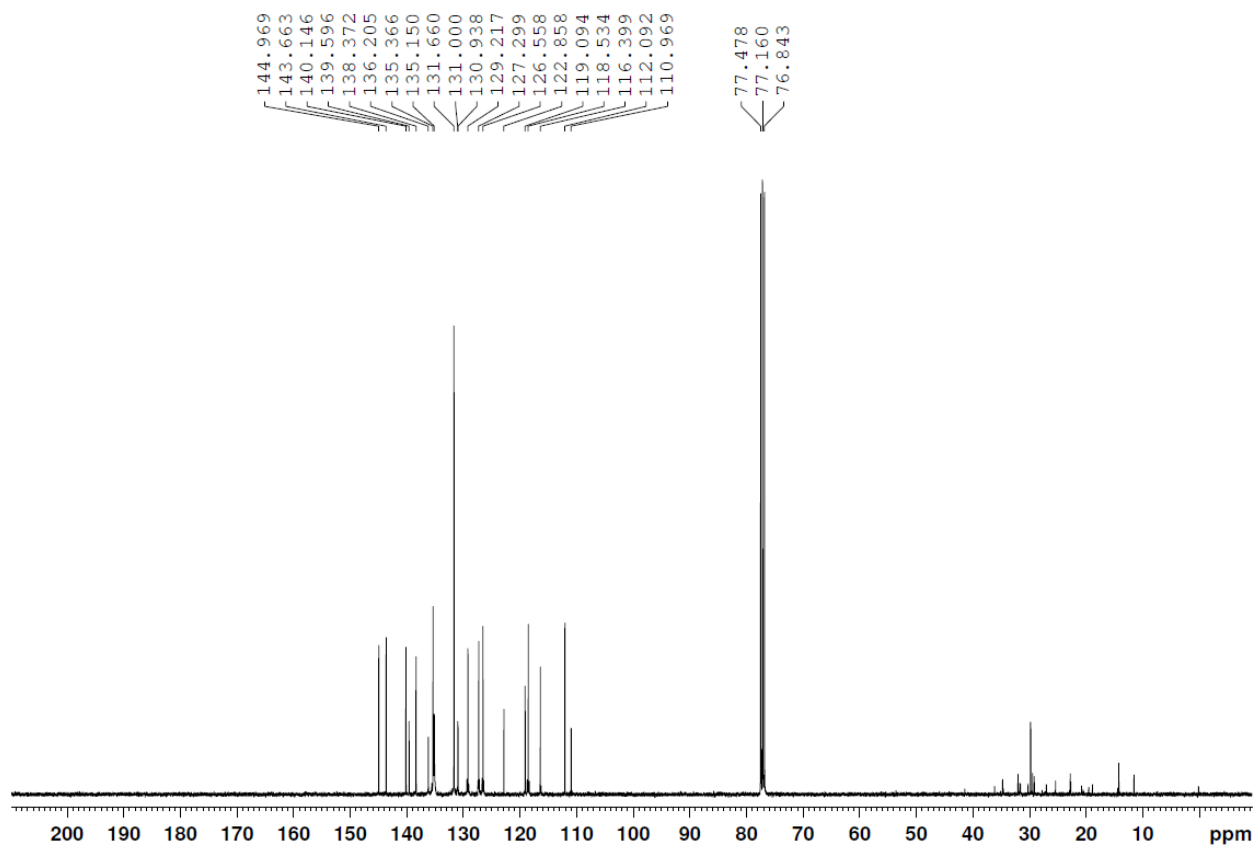

**Fig. S2**  $^{13}\text{C}$  NMR spectrum of 10-(4-bromophenyl)-5,15-bis(4-cyanophenyl)corrolato-tin(IV)-chloride, **3B**, in  $\text{CDCl}_3$ .

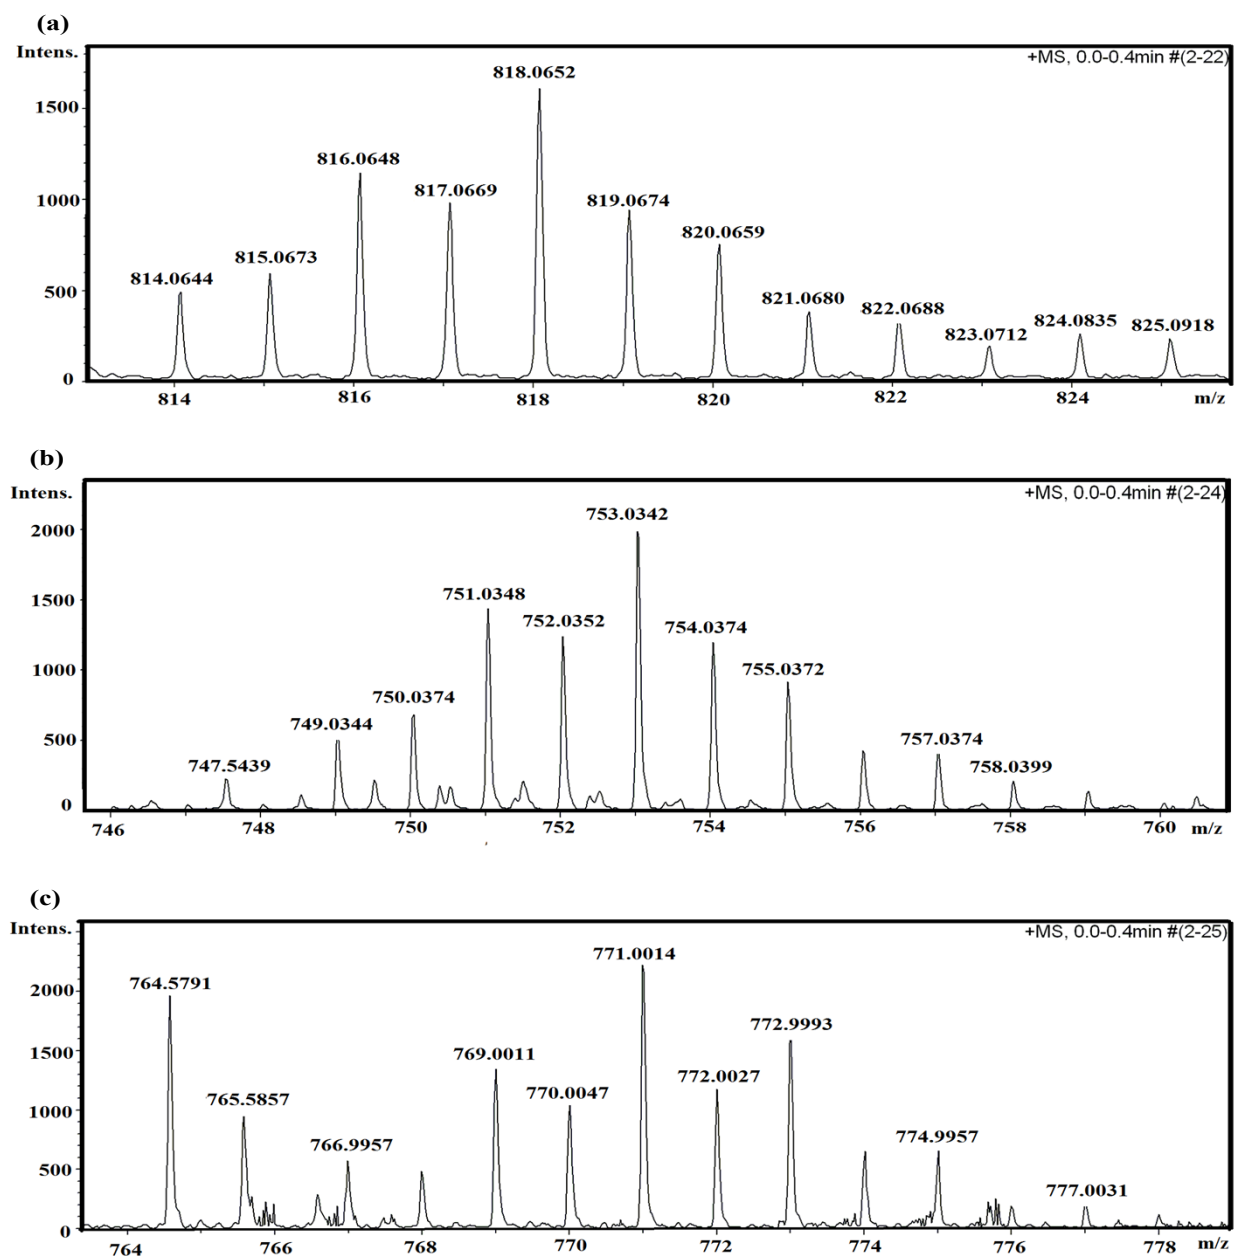

**Fig. S3** ESI- MS spectrum of (a) 10-(2,4,5-Trimethoxyphenyl)-5,15-bis(4-cyanophenyl)corrolato-tin(IV)-chloride, **1B** (b) 5,10,15-tris(4-cyanophenyl)corrolato-tin(IV)-chloride, **2B** and (c) 10-(4-bromophenyl)-5,15-bis(4-cyanophenyl)corrolato-tin(IV)-chloride, **3B** in CH<sub>3</sub>CN shows the measured spectrum with isotopic distribution pattern.

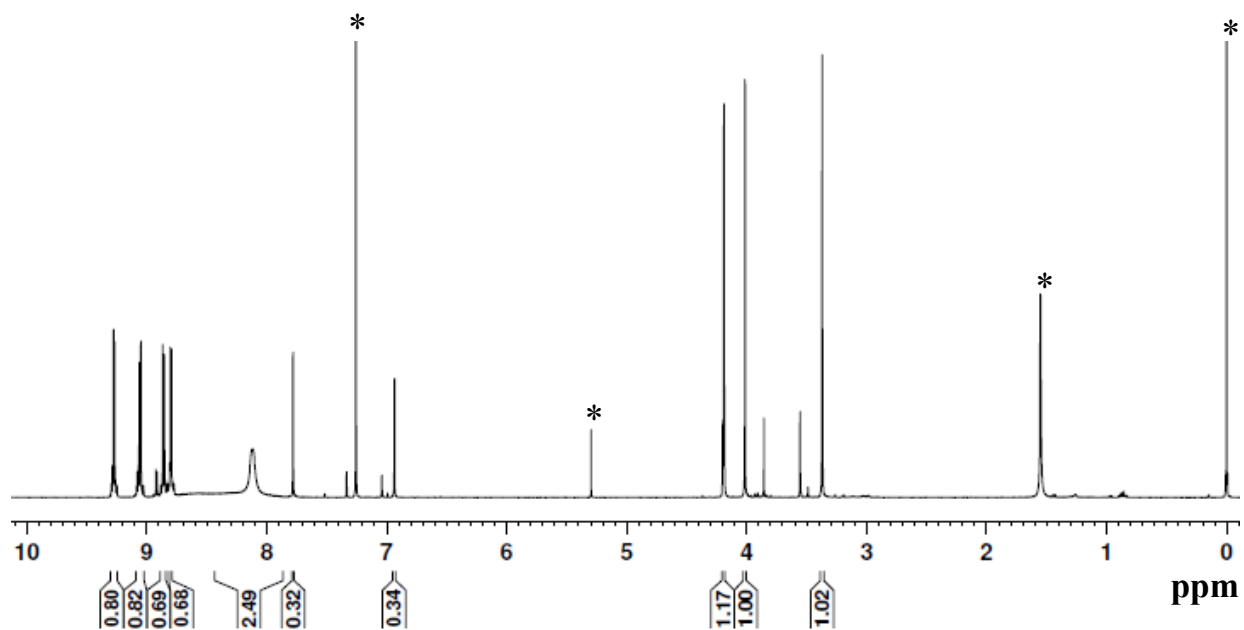

**Fig. S4**  $^1\text{H}$  NMR spectrum of 10-(2,4,5-Trimethoxyphenyl)-5,15-bis(4-cyanophenyl)corrolato-tin(IV)-chloride, **1B** in  $\text{CDCl}_3$ .

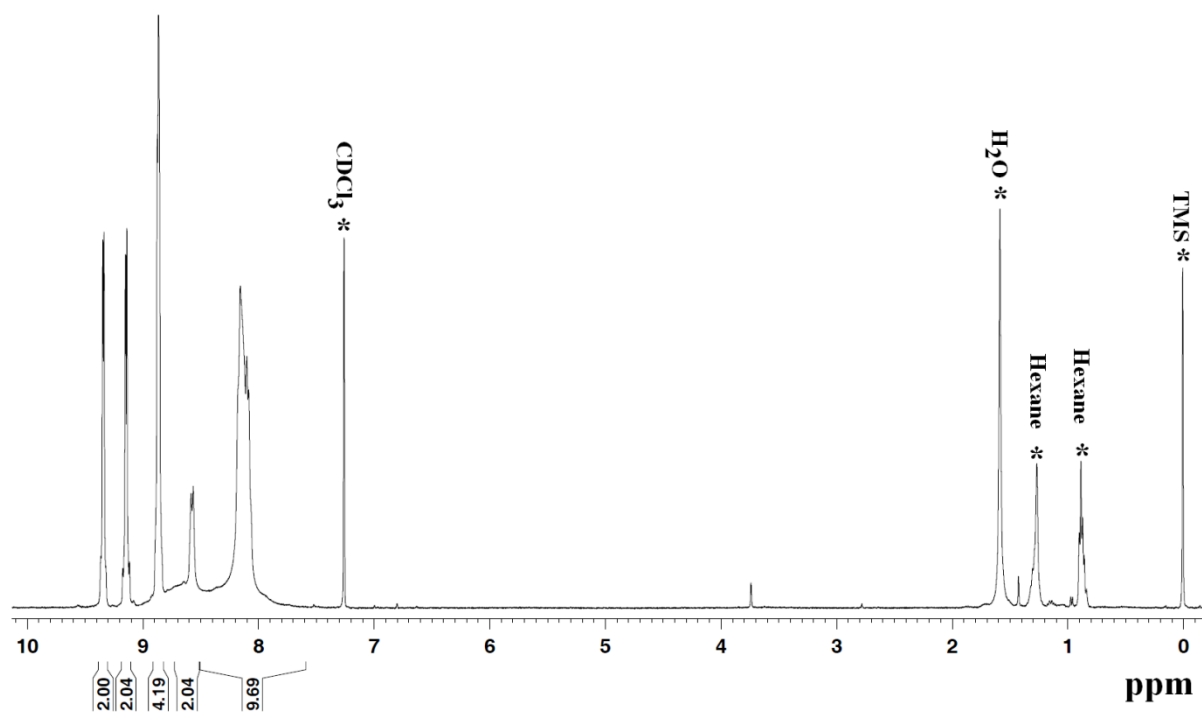

**Fig. S5**  $^1\text{H}$  NMR spectrum of 5,10,15-tris(4-cyanophenyl)corrolato-tin(IV)-chloride, **2B** in  $\text{CDCl}_3$ .



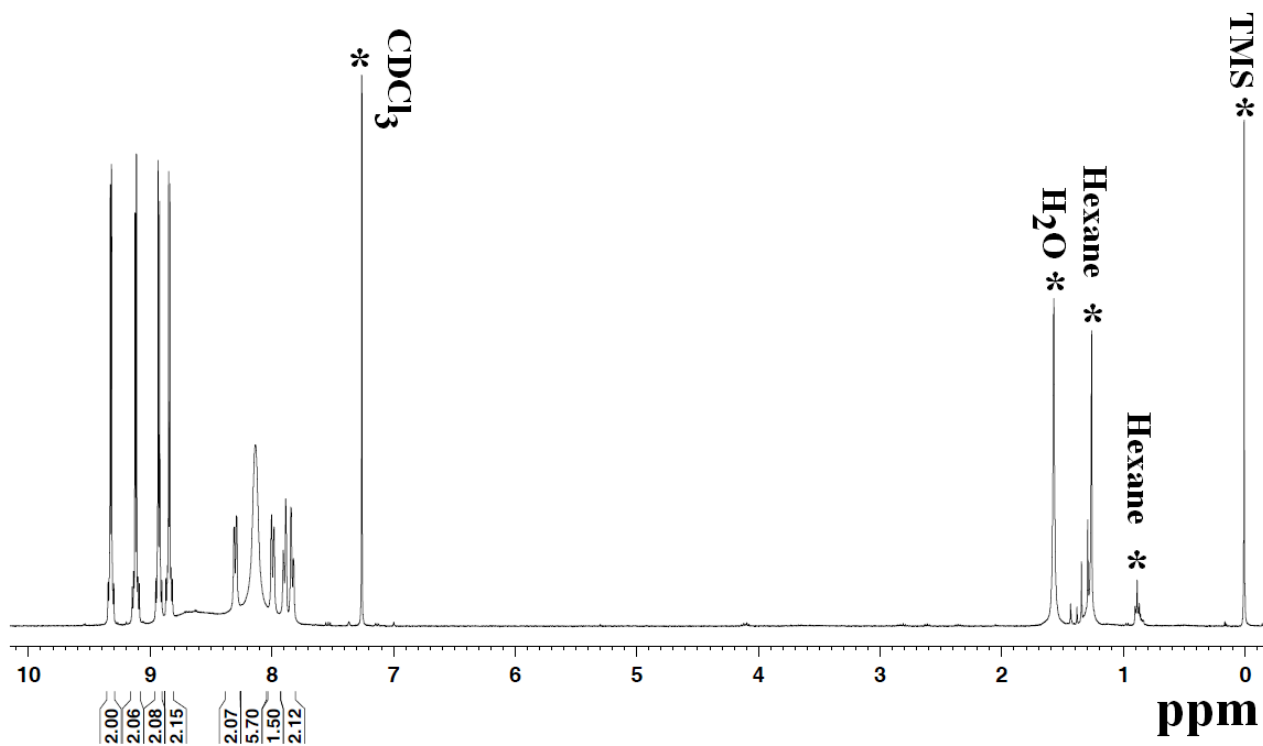

**Fig. S6**  $^1\text{H}$  NMR spectrum of 10-(4-bromophenyl)-5,15-bis(4-cyanophenyl)corrolato-tin(IV)-chloride, **3B**, in  $\text{CDCl}_3$ .

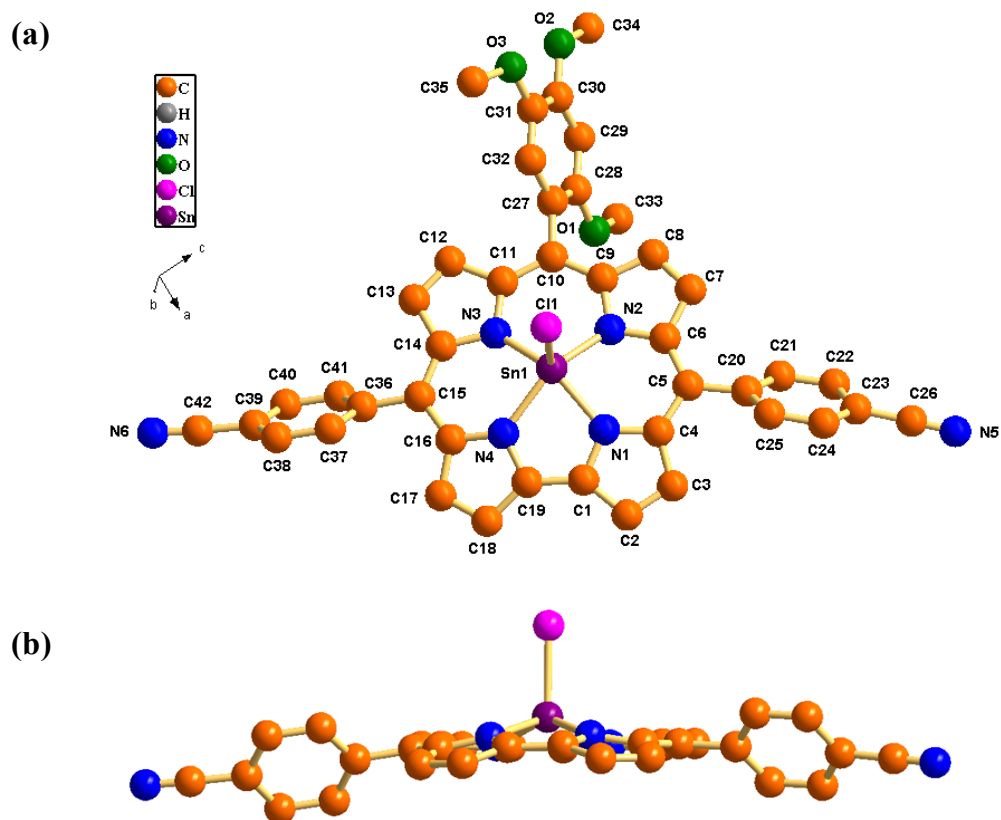

**Fig. S7** Single-crystal X-ray structure of 10-(2,4,5-Trimethoxyphenyl)-5,15-bis(4-cyanophenyl)corrolato-tin(IV)-chloride, **1B**, (a) top view (b) side view. Hydrogen atoms are omitted for clarity.

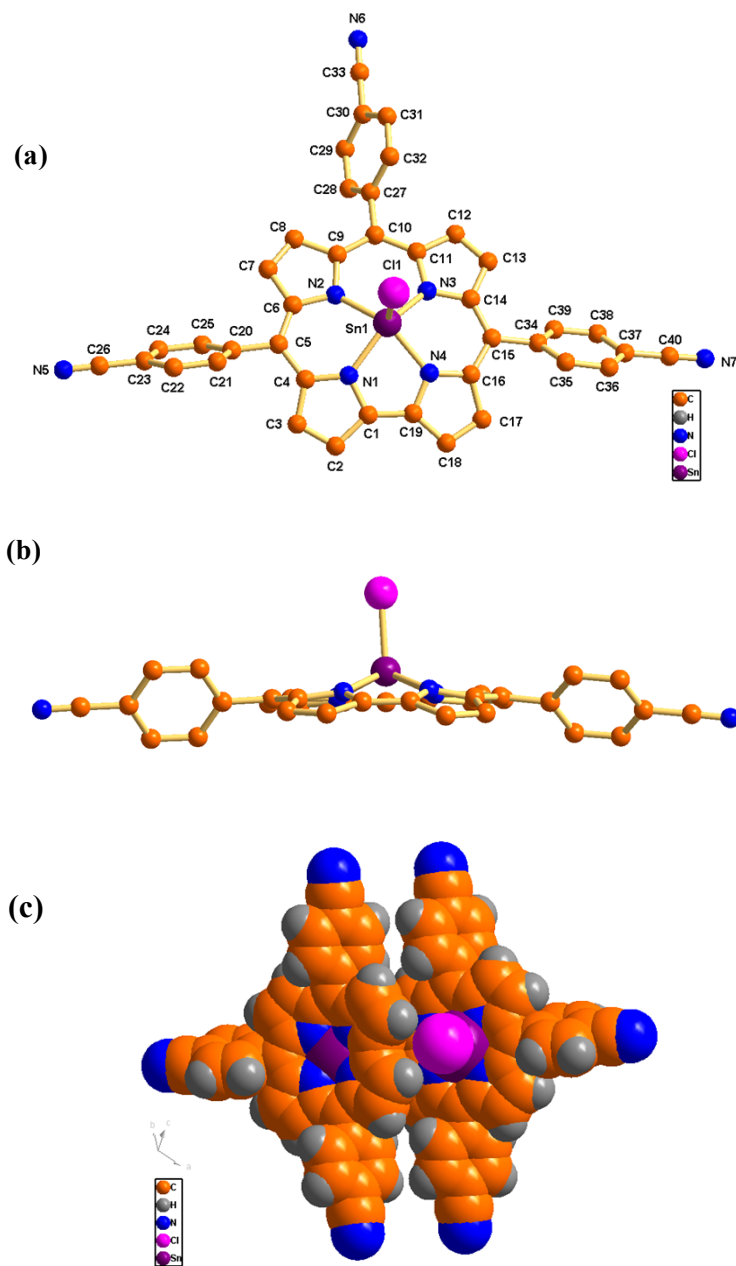

**Fig. S8** Single-crystal X-ray structure of 5,10,15-tris(4-cyanophenyl)corrolato-tin(IV)-chloride, **2B**, (a) top view (b) side view, and (c)  $\pi$ - $\pi$  stacking interactions. Hydrogen atoms are omitted for clarity.

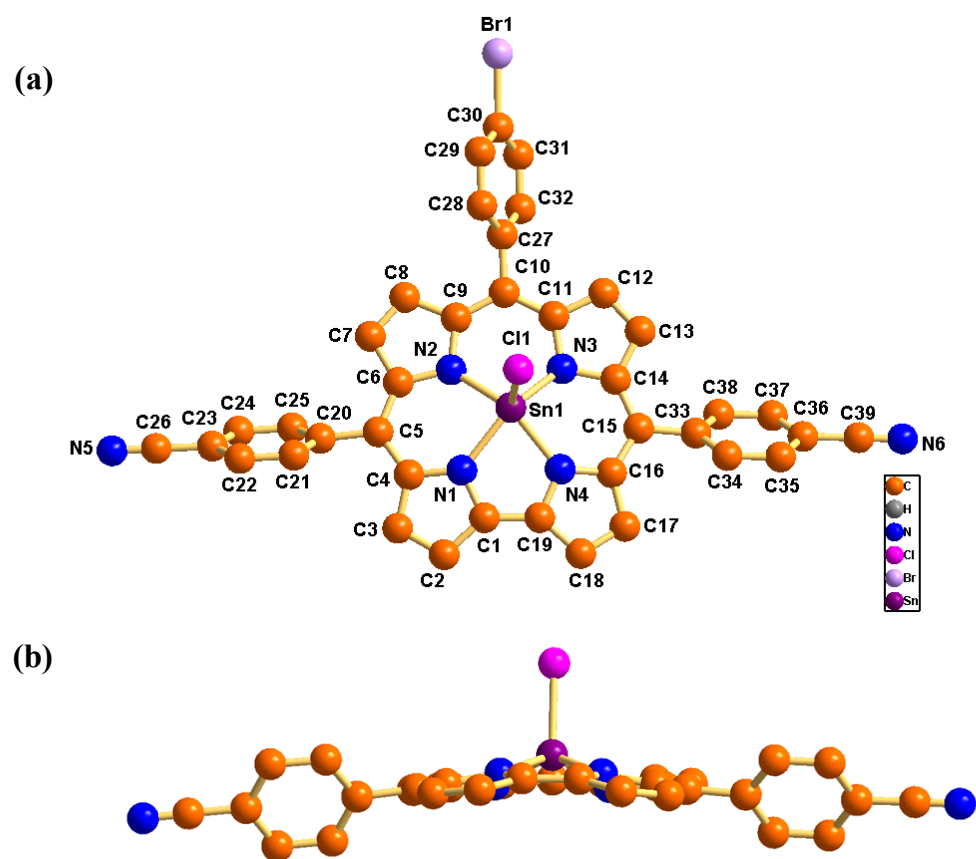

**Fig. S9** Single-crystal X-ray structure of 10-(4-bromophenyl)-5,15-bis(4-cyanophenyl)corrolato-tin(IV)-chloride, **3B**, (a) top view (b) side view. Hydrogen atoms are omitted for clarity.

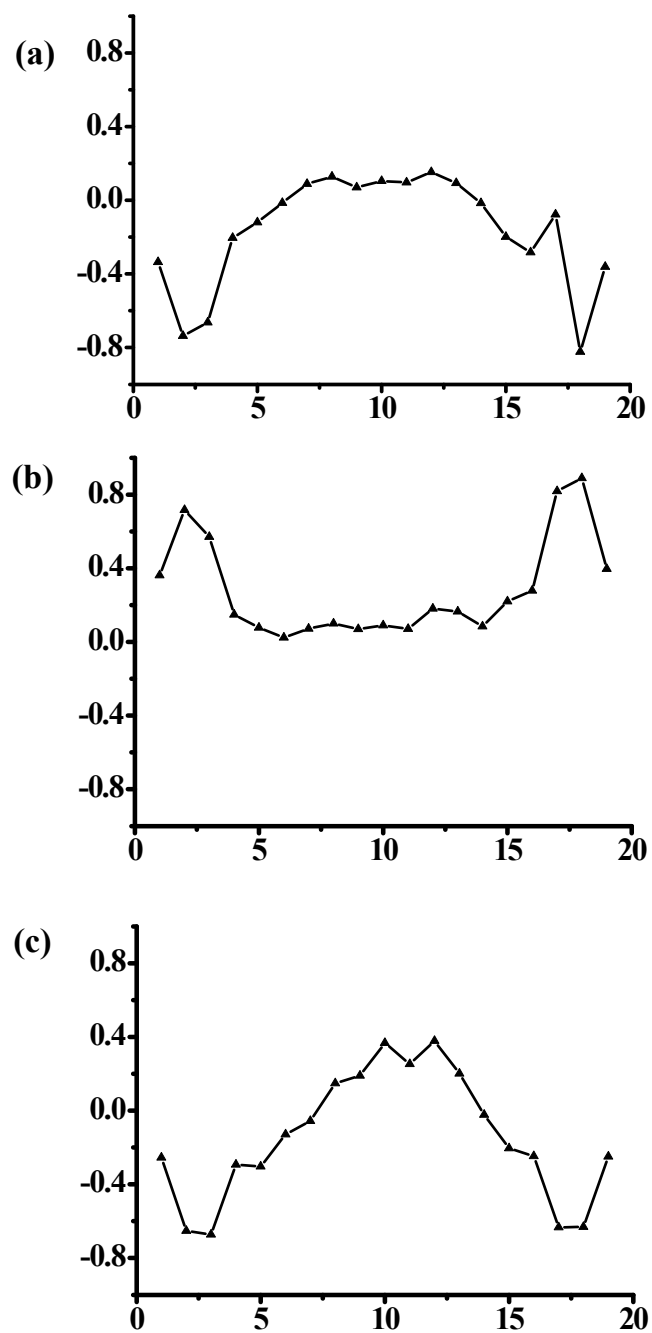

**Fig. S10** Vertical displacement of the peripheral carbon atoms from the N4 corrole planes in (a) **1B** (b) **2B** and (c) **3B**.

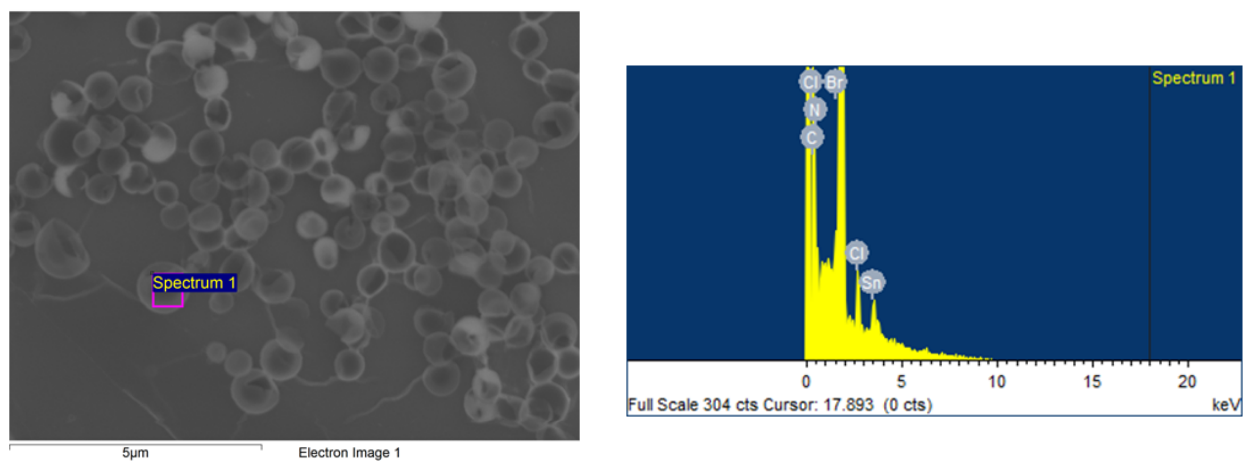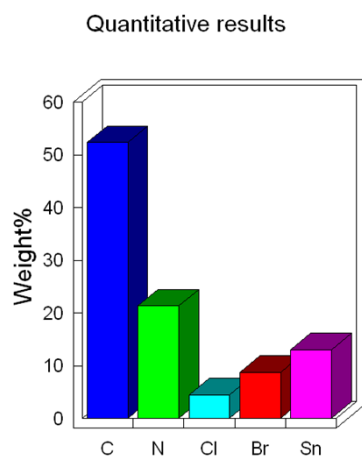

| Element | Weight% |
|---------|---------|
| C K     | 52.32   |
| N K     | 21.35   |
| Cl K    | 4.51    |
| Br L    | 8.79    |
| Sn L    | 13.03   |
| Totals  | 100.00  |

**Fig. S11** EDX elemental analysis obtained from the nanospheres of **3B** showing the presence of the entire constituent elements: C, N, Cl, Br, and Sn.
